# Supplementary material for: Clinical Characteristics Associated with Adherence and Persistence in Patients with Type 2 Diabetes Mellitus Treated with Dulaglutide
Source: Hindawi journal article supplement (doi:10.1155/2023/7917641), 2023-06-01
Supplement: f1 [file 7917641.f1.pdf]

## SUPPLEMENTARY MATERIALS

**Table S1 List of identifiable risk factors for CVD**

| Identifiable risk factor           | Criteria                                         |
|------------------------------------|--------------------------------------------------|
| LDL-C                              | ≥100 mg/dL                                       |
| TG                                 | ≥150 mg/dL                                       |
| HDL-C                              | <40 mg/dL (men), <50 mg/dL (women)               |
| Blood Pressure                     | ≥140 mmHg (systolic) and/or ≥90 mmHg (diastolic) |
| Baseline hypertension <sup>†</sup> | Diagnosis record exists at baseline              |
| Baseline obesity                   | Diagnosis record exists at baseline              |
| Baseline dyslipidemia <sup>‡</sup> | Diagnosis record exists at baseline              |
| Baseline CVD                       | Diagnosis record exists at baseline              |

<sup>†</sup>Counted only the subjects who did not meet the criteria for blood pressure; <sup>‡</sup>Counted only the subjects who did not meet the criteria for LDL-C, TG, and HDL-C; Abbreviations: LDL-C, low density lipoprotein Cholesterol; TG, triglyceride; HDL-C, high density lipoprotein cholesterol; CVD, cardiovascular disease

**Table S 2 Sensitivity analysis results (using cutoff as 90-day prescription gap)**

| Endpoint                      | 60-day prescription gap<br>(n=236) | 90-day prescription gap<br>(n=236) | P value |
|-------------------------------|------------------------------------|------------------------------------|---------|
| PDC, mean (SD)                | 0.65 (0.3)                         | 0.67 (0.3)                         | 0.46    |
| Treatment duration, mean (SD) | 236.8 (124.9)                      | 244.9 (116.7)                      | 0.46    |
| Adherence, n (%)              | 115 (48.7)                         | 115 (48.7)                         | 0.93    |
| Continuation, n (%)           | 119 (50.4)                         | 131 (55.5)                         | 0.27    |

SD, standard deviation; PDC, proportion of days covered; P value determined by Student's t-tests for PDC and treatment duration and by  $\chi^2$  tests for adherence and continuation

**Table S 3 Comparison of baseline characteristics between matched cohorts**

| Variable                                      | Subjects with $\geq 2$ identifiable CVD risk factors (n=169) | Subjects with $< 2$ identifiable CVD risk factor (n=67) | p value |
|-----------------------------------------------|--------------------------------------------------------------|---------------------------------------------------------|---------|
| <b>Demographics</b>                           |                                                              |                                                         |         |
| Age (years), mean (SD)                        | 55.2 (14.1)                                                  | 56.3 (12.8)                                             | 0.594   |
| Sex (male, %)                                 | 45.0                                                         | 52.2                                                    | 0.120   |
| <b>Laboratory test results</b>                |                                                              |                                                         |         |
| HbA1c (%), mean (SD)                          | 8.2(1.4)                                                     | 8.4 (1.4)                                               | 0.310   |
| eGFR (mL/min/1.72 m <sup>2</sup> ), mean (SD) | 85.9 (26.5)                                                  | 85.0 (28.4)                                             | 0.810   |
| PG (mg/dL), mean (SD)                         | 159.1 (54.6)                                                 | 157.3 (53.7)                                            | 0.820   |
| <b>Concomitant medication</b>                 |                                                              |                                                         |         |
| Metformin users (%)                           | 94.0                                                         | 89.6                                                    | 0.557   |
| Insulin users (%)                             | 39.5                                                         | 32.8                                                    | 0.459   |
| DPP4 inhibitor users (%)                      | 17.4                                                         | 19.4                                                    | 0.828   |
| SGLT2 inhibitor users (%)                     | 19.8                                                         | 19.4                                                    | 1.000   |
| Sulfonylurea users (%)                        | 60.5                                                         | 71.6                                                    | 0.120   |
| <b>Comorbidities</b>                          |                                                              |                                                         |         |
| Kidney disease (%)                            | 22.5                                                         | 17.9                                                    | 0.549   |
| Eye disease (%)                               | 29.0                                                         | 34.3                                                    | 0.518   |
| Neuropathy (%)                                | 11.8                                                         | 13.4                                                    | 0.907   |

CVD, Cardiovascular disease; SD, standard deviation; HbA1c, glycated hemoglobin A1c; GFR, glomerular filtration rate; PG, postprandial glucose; DPP4, dipeptidyl peptidase 4; SGLT2, sodium glucose co-transporter 2; p values were calculated using Student's t-tests and  $\chi^2$  tests for continuous and categorical variables, respectively.

**Table S 4 Comparative analysis of endpoints in patients with and without high CVD risk**

| Endpoint                      | Subjects with $\geq 2$ identifiable CVD | Subjects with $< 2$ identifiable CVD | P value |
|-------------------------------|-----------------------------------------|--------------------------------------|---------|
|                               | risk factors (n=169)                    | risk factors (n=67)                  |         |
| PDC, mean (SD)                | 0.63 (0.34)                             | 0.69 (0.34)                          | 0.219   |
| Treatment duration, mean (SD) | 230.5 (125.0)                           | 252.6 (123.9)                        | 0.221   |
| Adherence, n (%)              | 78 (46.2)                               | 37 (55.2)                            | 0.210   |
| Continuation, n (%)           | 80 (47.3)                               | 39 (58.2)                            | 0.132   |

SD, standard deviation; PDC, proportion of days covered; CVD, cardiovascular disease; P value determined by Student's t-tests for PDC and treatment duration and by  $\chi^2$  tests for adherence and continuation

**Table S 5 Comparative analysis of endpoints in patients with and without high CVD risk (sensitivity analysis)**

| Endpoint                      | Patients with $\geq 3$ CVD risk<br>(n = 77) | Patients with $< 3$ CVD risk<br>(n = 159) | P value |
|-------------------------------|---------------------------------------------|-------------------------------------------|---------|
| PDC, mean (SD)                | 0.66 (0.35)                                 | 0.64 (0.34)                               | 0.62    |
| Treatment duration, mean (SD) | 242.5 (125.6)                               | 233.9 (124.8)                             | 0.62    |
| Adherence, n (%)              | 39 (50.6)                                   | 76 (47.8)                                 | 0.68    |
| Continuation, n (%)           | 40 (51.9)                                   | 79 (49.7)                                 | 0.74    |

SD, standard deviation; PDC, proportion of days covered; CVD, cardiovascular disease; P value determined by Student's t-tests for PDC and treatment duration and by  $\chi^2$  tests for adherence and continuation

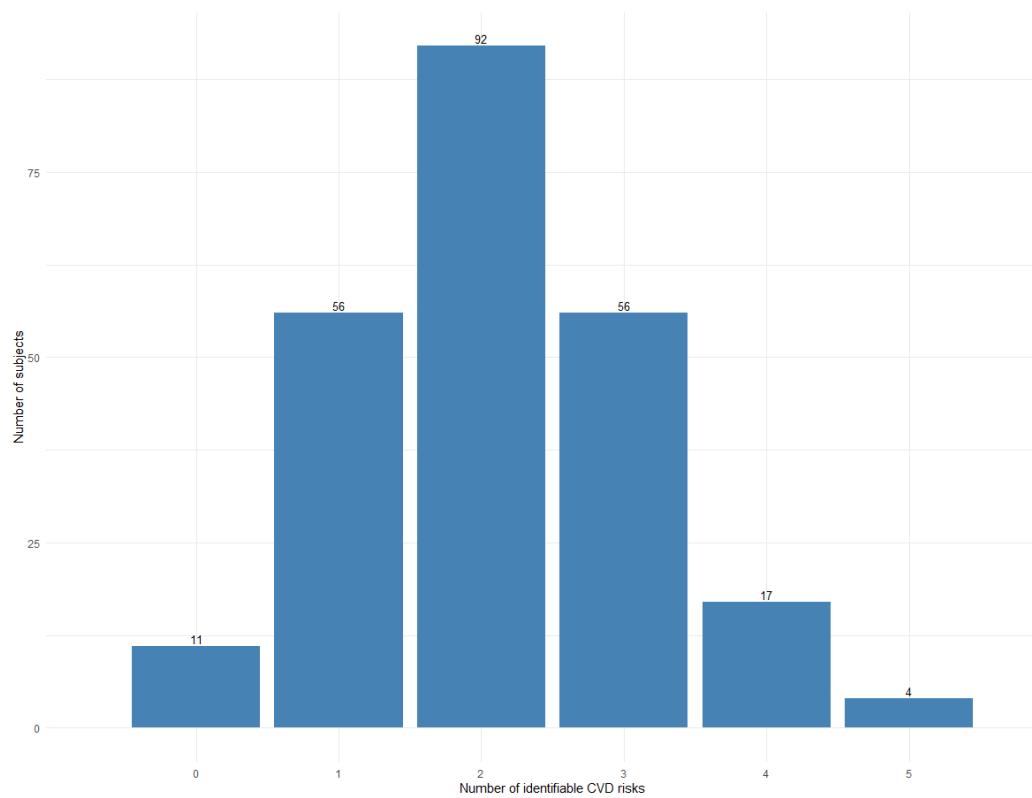

**Figure S 1 Distribution of number of identifiable risk factors for cardiovascular disease (CVD)**

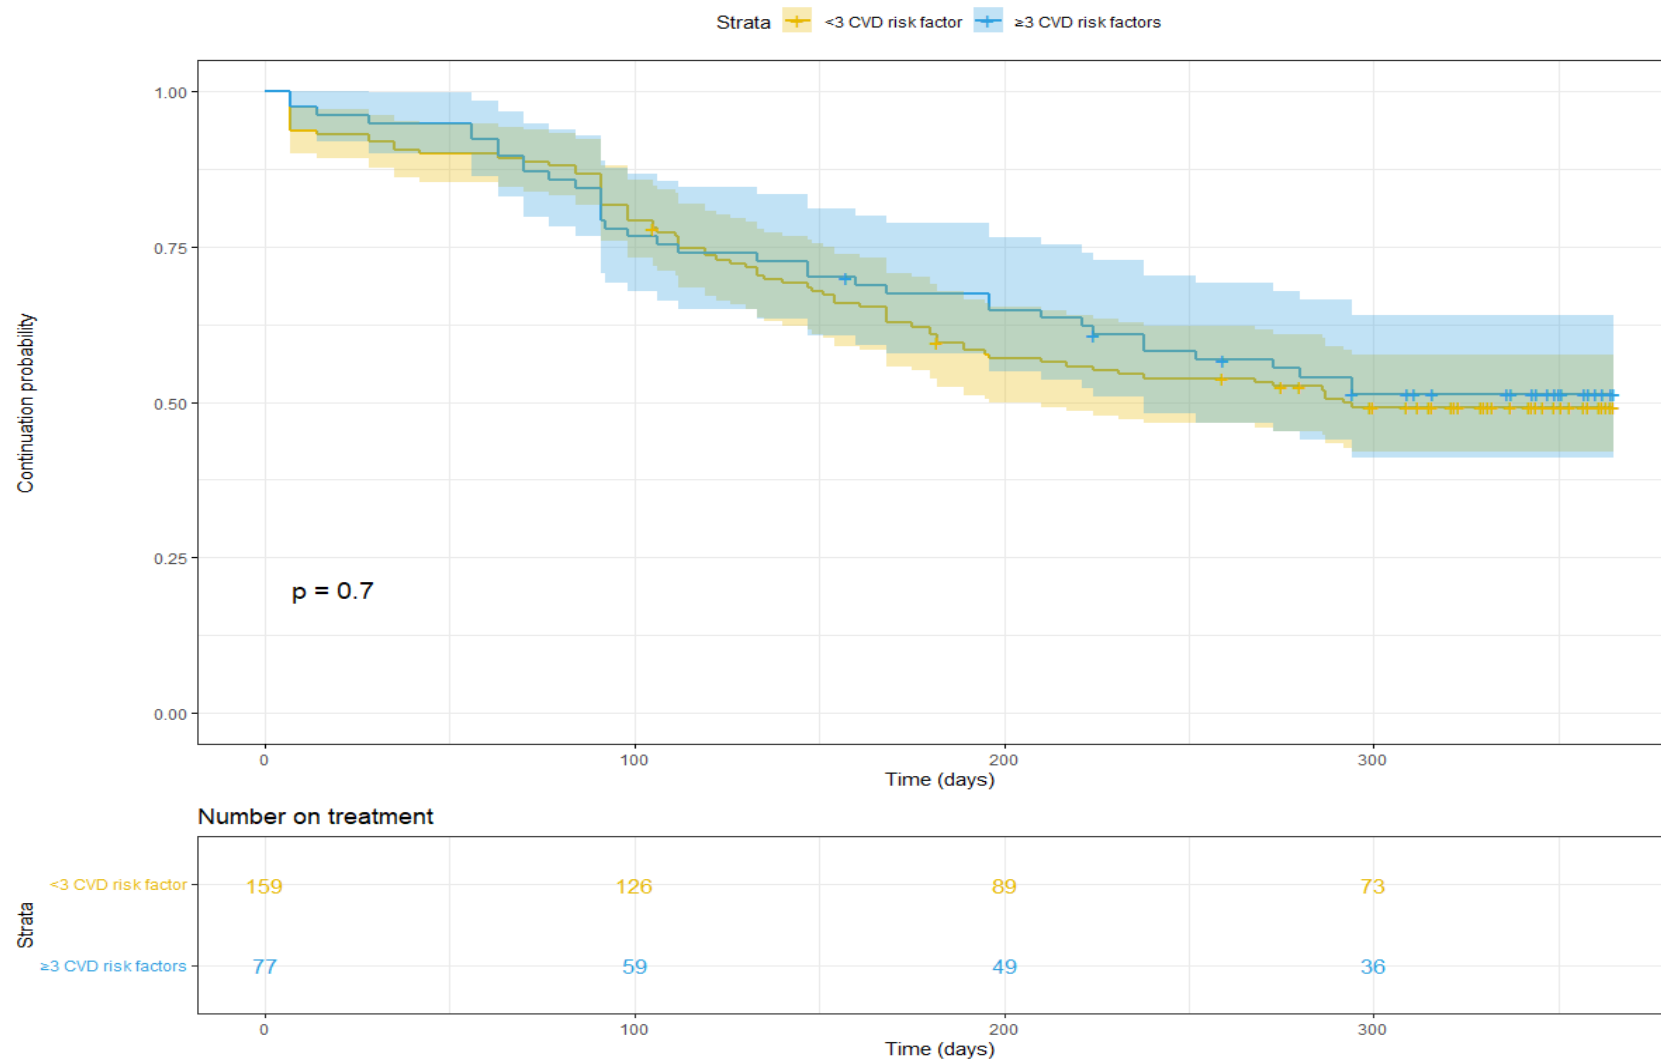

**Figure S 2 Kaplan-Meier curve for the comparison of time to treatment discontinuation on the matched cohorts between subjects with  $<3$  CVD risk (n=159) and subjects with  $\geq 3$  CVD risk(s) (n=77). Median was not reached for subjects with  $\geq 3$  CVD risks and was 292 days for subjects with  $<3$  CVD risk factors. P value was determined by log-rank test ( $\chi^2=0.1$ , at 1 degree of freedom). Abbreviations: CVD, cardiovascular disease**
